# Supplementary material
Source: PubMed Central journal article supplement (PMC4439296)
Supplement: NIHMS680992-supplement-01.pdf [file NIHMS680992-supplement-01.pdf]

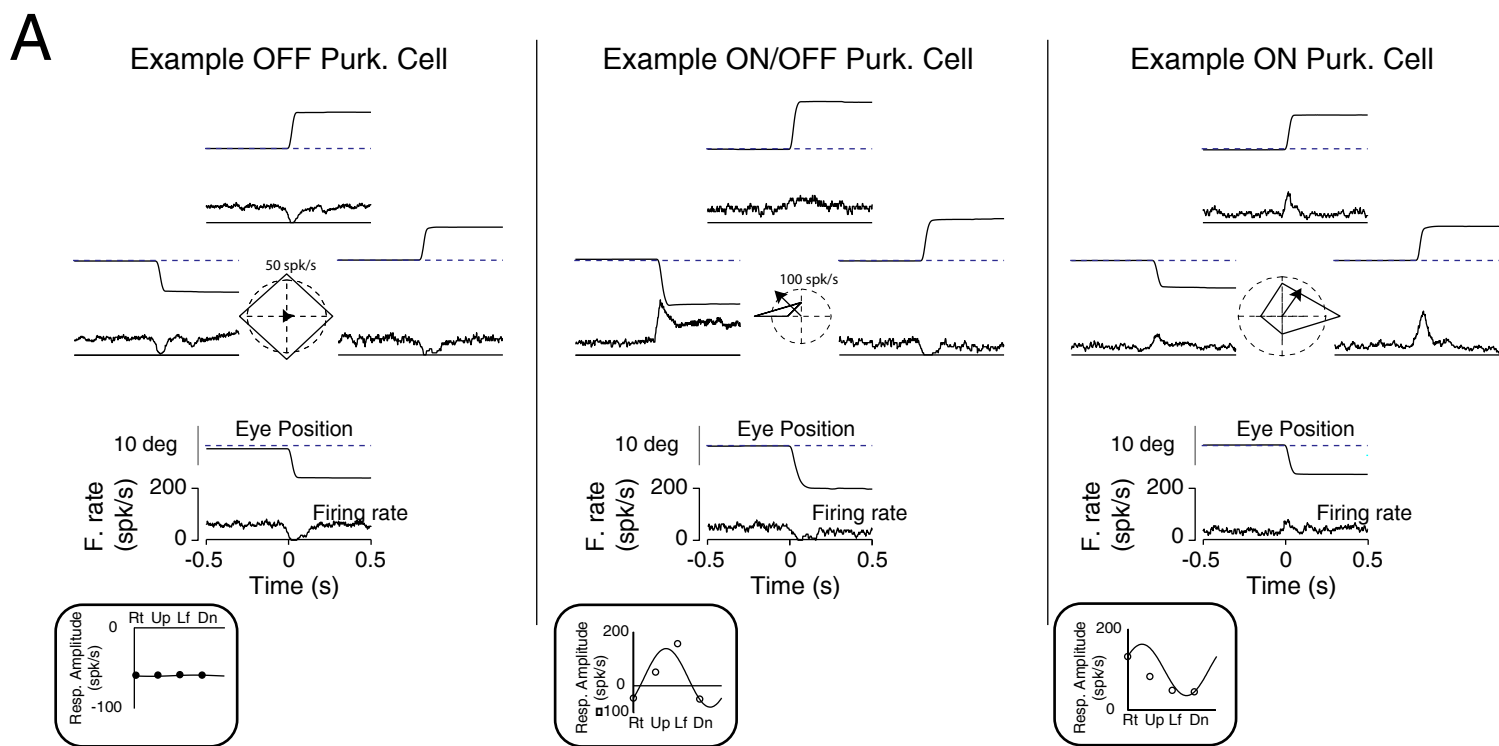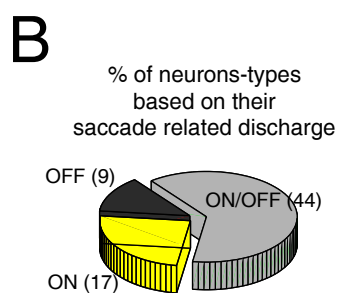

Figure S1

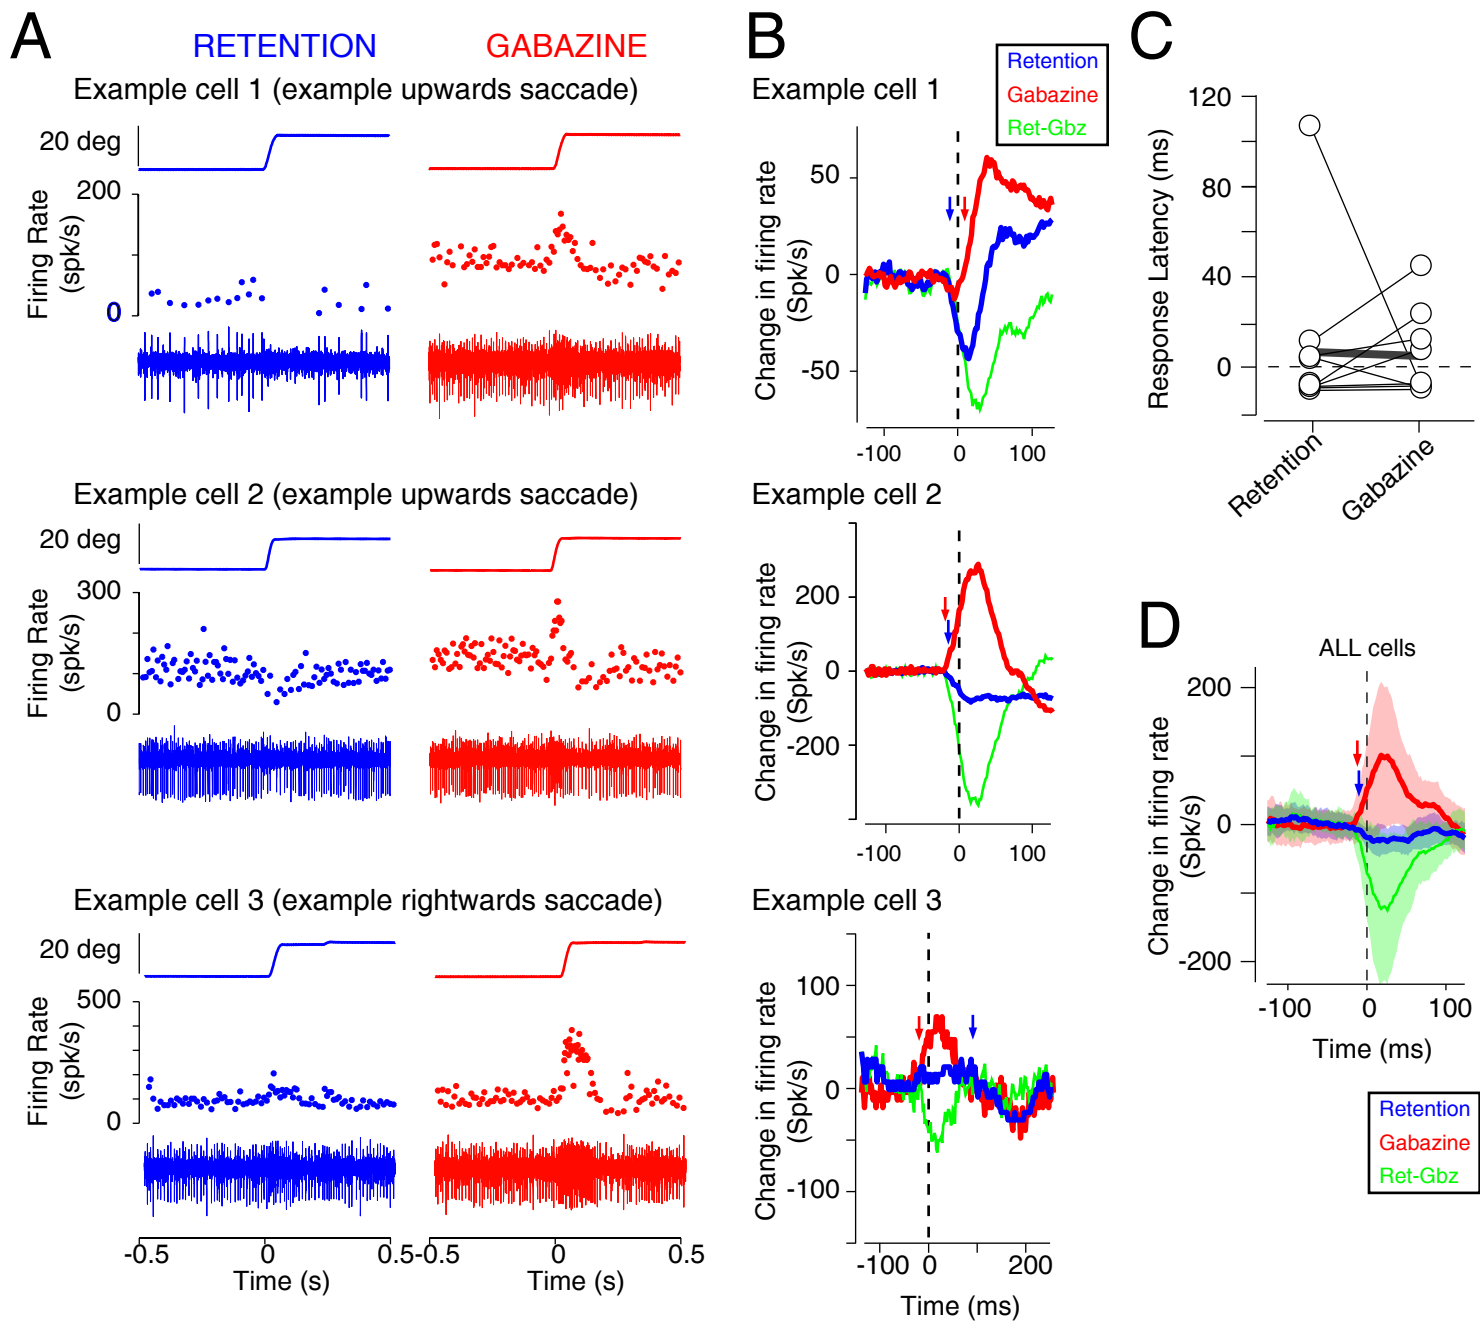

Figure S2

**A****Sinusoidal Pursuit**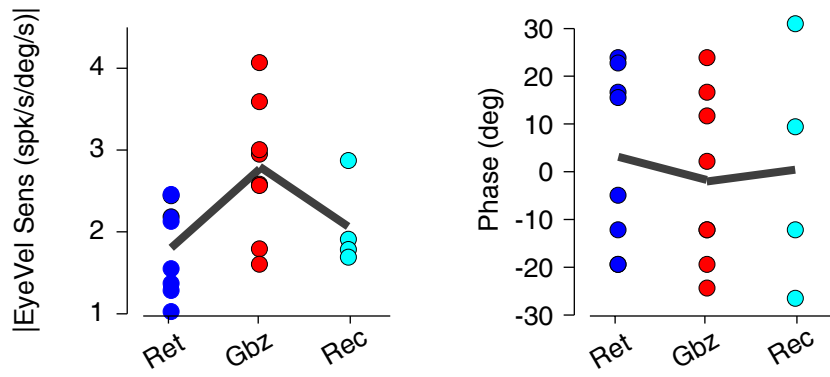**B****VOR cancellation**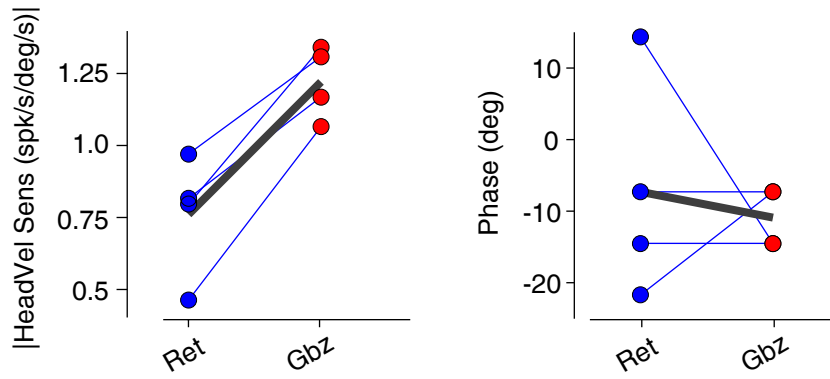

Figure S4

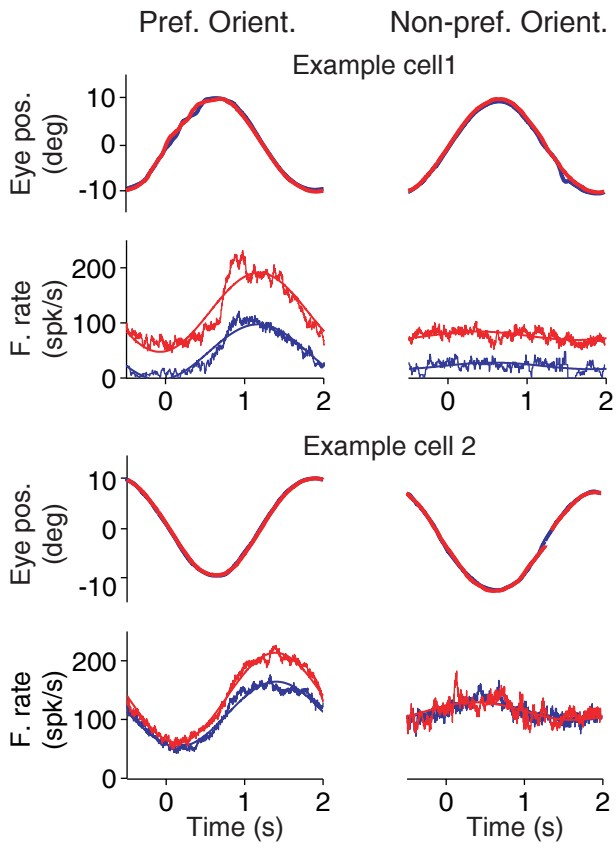

Figure S5

### Pursuit Parameters

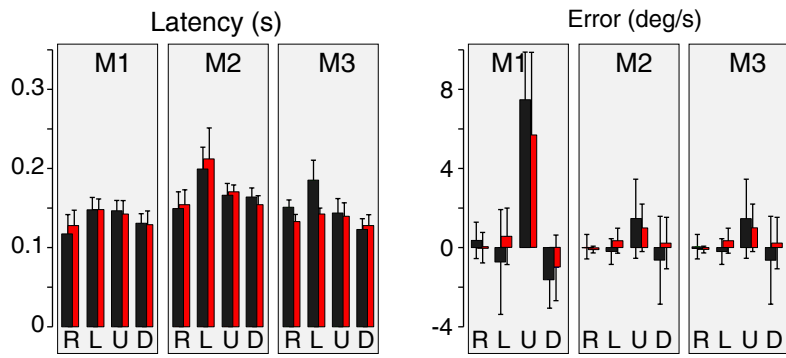

Figure S6

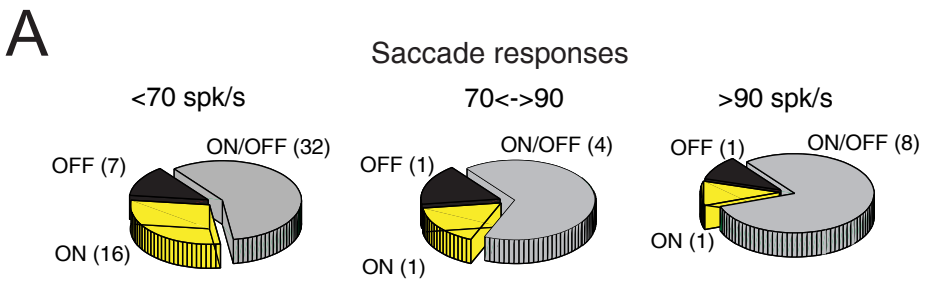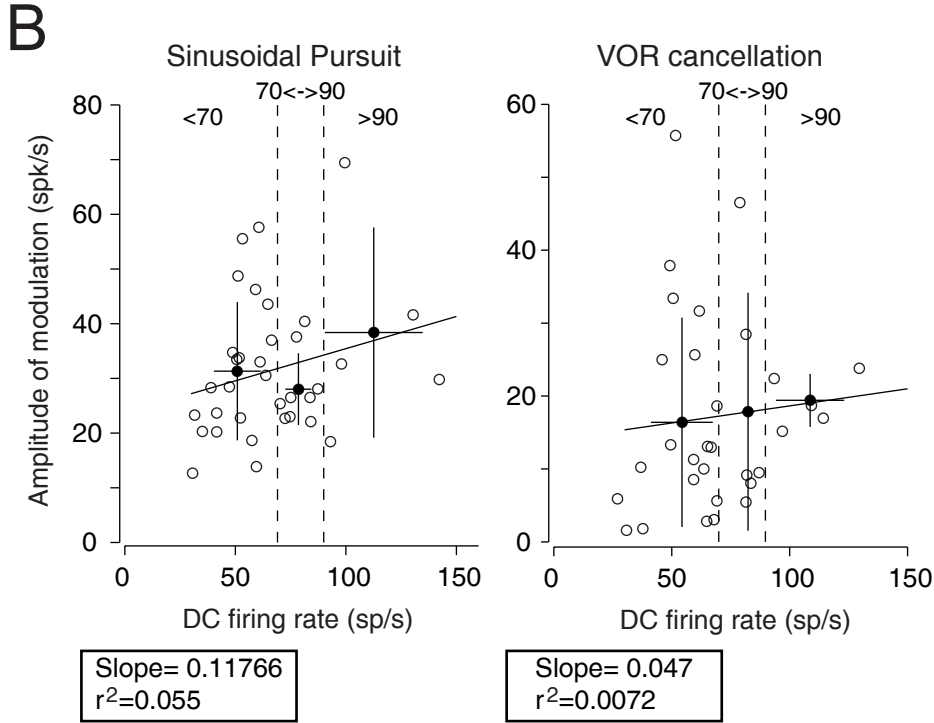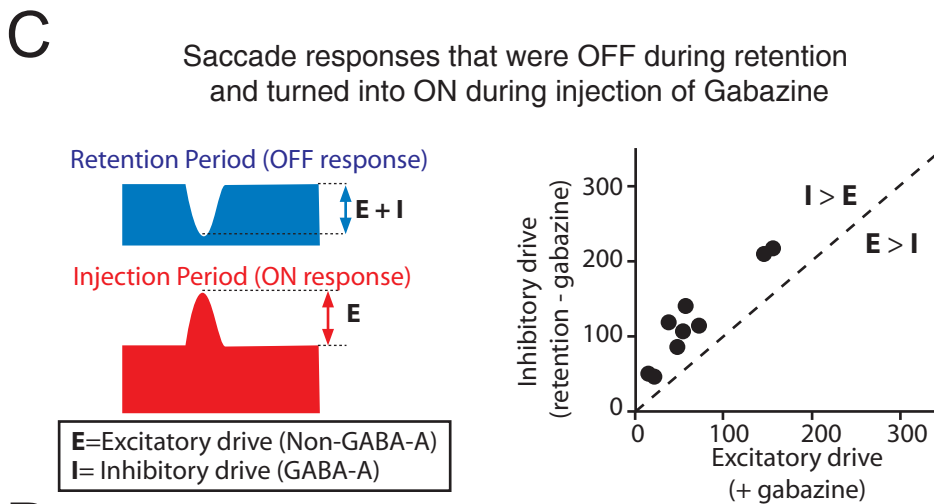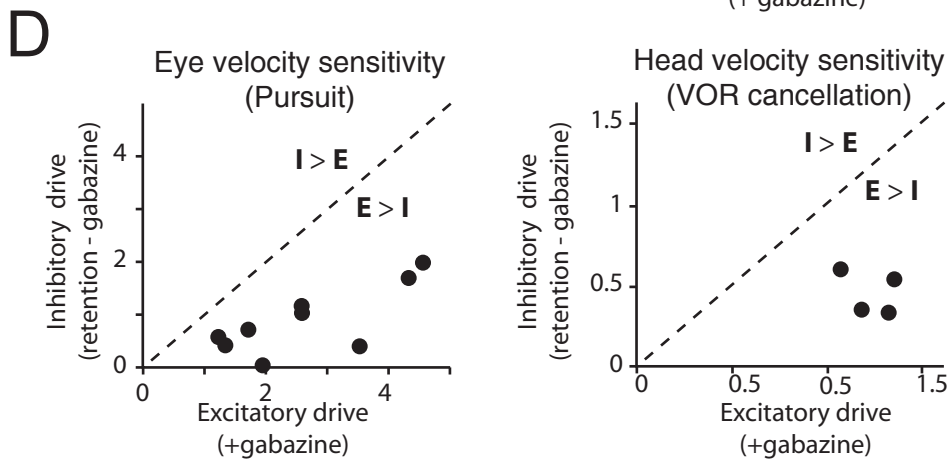

Figure S7

### Saccade Parameters

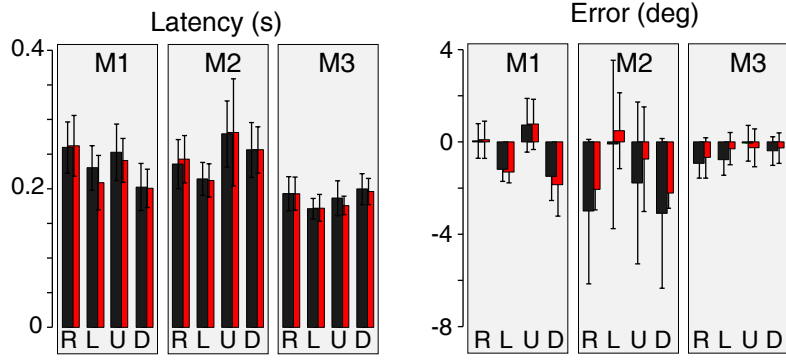

Figure S3
